# Supplementary material for: Antitumor activity of curcumin is involved in down-regulation of YAP/TAZ expression in pancreatic cancer cells
Source: PubMed Central journal article supplement (PMC5346699; doi:10.18632/oncotarget.12596), 2016-10-12
Supplement: oncotarget-07-79076-s001.pdf [file oncotarget-07-79076-s001.pdf]

## Antitumor activity of curcumin is involved in down-regulation of YAP/TAZ expression in pancreatic cancer cells

### SUPPLEMENTARY FIGURE

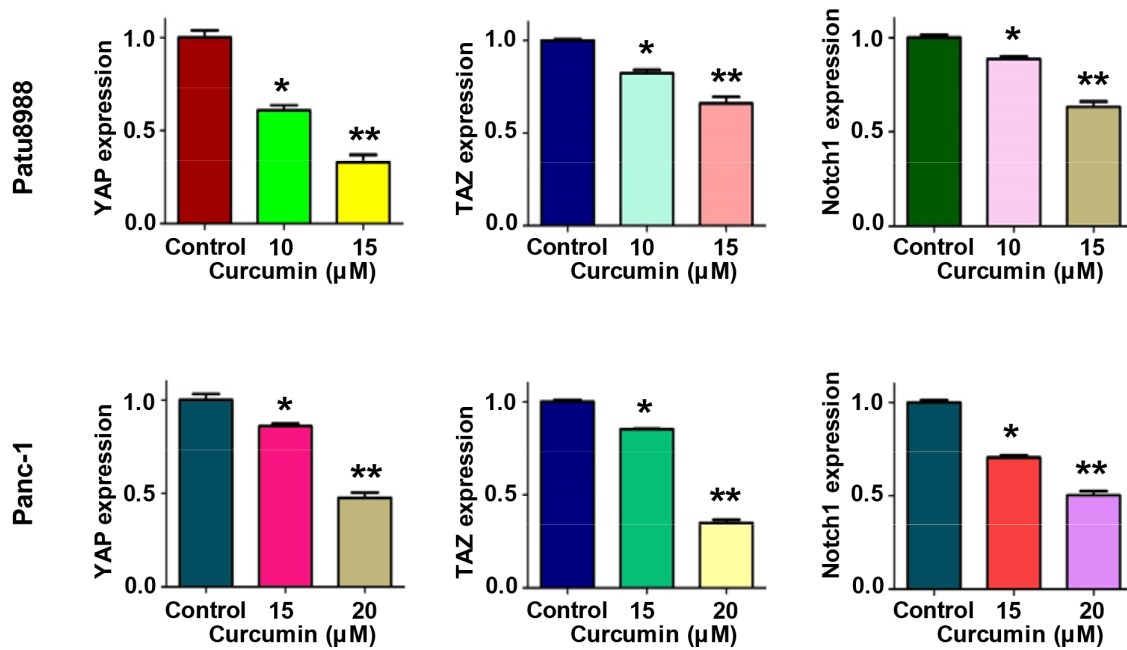

Supplementary Figure S1: Quantitative results are illustrated for Figure 3C.
